# Supplementary material for: Synthesis and properties of rhenium tricarbonyl complex bearing N-fused tetraphenylporphyrin ligand
Source: Royal Society of Chemistry journal article supplement (doi:10.1039/b406234e), 2004-01-01
Supplement: b406234e.pdf [file b406234e.pdf]

## Supplementary Information

For

Synthesis and properties of rhenium tricarbonyl complex  
bearing N-fused tetraphenylporphyrin ligand

Motoki Toganoh, Tomoya Ishizuka and Hiroyuki Furuta\*

*Department of Chemistry and Biochemistry, Graduate School of  
Engineering, Kyushu University, Fukuoka 812-8581, Japan.*

*Fax: (+81)92-651-5606; Tel: (+81)92-642-3548*

*E-mail: hfuruta@cstf.kyushu-u.ac.jp*

### Table of Contents

|           |                                 |       |           |
|-----------|---------------------------------|-------|-----------|
| <b>1.</b> | <b>Experimental Section</b>     | ..... | <b>S1</b> |
| <b>2.</b> | <b>Cyclic Voltammogram of 4</b> | ..... | <b>S2</b> |

### 1. Experimental Section

#### Synthesis of NFTPP-Re(CO)<sub>3</sub> (4)

##### (a) From NCTPP (3)

A solution of NCTPP (65.3 mg, 104  $\mu\text{mol}$ , 1.0 equiv) and  $\text{Re}_2(\text{CO})_{10}$  (37.1 mg, 56.9  $\mu\text{mol}$ , 0.54 equiv) in 1,2-dichlorobenzene (20.0 ml) was degassed under reduced pressure ( $\sim 0.3$  mmHg) at 0  $^\circ\text{C}$ . The resulting mixture was heated at 160  $^\circ\text{C}$  for 36 h under argon atmosphere. After cooling, 1,2-dichlorobenzene was removed under reduced pressure and the residue was purified by silica gel column chromatography (eluent:  $\text{CH}_2\text{Cl}_2/\text{hexane} = 1/1$ ). The first violet fraction collected was concentrated to dryness to give **4** in 65% yield (61.0 mg, 69.1  $\mu\text{mol}$ ). IR (powder,  $\text{cm}^{-1}$ ): 2080.8, 2008.5;  $^1\text{H}$  NMR ( $\text{CDCl}_3$ , 300 MHz, ppm):  $\delta$   $\sim 7.25$  (1H, overlapped with a peak due to  $\text{CHCl}_3$ ), 7.34 (d,  $J = 5.2$  Hz, 1H), 7.49 (d,  $J = 4.6$  Hz, 1H), 7.52–7.63 (m, 4H), 7.71–7.84 (m, 11H), 8.00–8.08 (m, 2H), 8.18–8.22 (m, 2H), 8.69 (dd,  $J = 0.9, 8.2$  Hz,

2H), 8.75 (d,  $J = 5.2$  Hz, 1H), 9.21 (d,  $J = 5.2$  Hz, 1H), 9.28 (s, 1H);  $^{13}\text{C}$  NMR ( $\text{CS}_2$ , 75 MHz, ppm):  $\delta$  111.87, 112.31, 119.47, 121.08, 123.61, 126.05, 127.46, 127.49, 128.21, 128.7, 128.49, 128.88, 129.35, 129.36, 129.82, 131.29, 131.70, 132.32, 133.01, 134.92, 136.72, 137.47, 137.75, 138.20, 140.16, 142.86, 144.92, 149.70, 153.64, 153.80, 153.99, 157.43, 163.51, 193.24, 193.52, 193.71; MS (ESI, positive): 880 ( $\text{M}^+$ ); MS (MALDI, positive): 796 ( $[\text{M}-3(\text{CO})]^+$ ); Anal. Calcd for **4**: C, 64.01; H, 3.09; N, 6.35. Found: C, 63.78; H, 3.20; N, 6.25; UV-vis ( $\text{CH}_2\text{Cl}_2$ ,  $\lambda_{\text{max}}/\text{nm}$  ( $\epsilon$ )): 358 (42000), 496 (46800), 863 (2650), 950 (2550).

(b) From NFTPP (**7**)

A solution of NFTPP (6.2 mg, 10  $\mu\text{mol}$ , 1.0 equiv) and  $\text{Re}_2(\text{CO})_{10}$  (3.5 mg, 5.4  $\mu\text{mol}$ , 0.53 equiv) in 1,2-dichlorobenzene (6.0 ml) was degassed under reduced pressure ( $\sim 0.3$  mmHg) at 0  $^\circ\text{C}$ . The resulting mixture was heated at 130  $^\circ\text{C}$  for 41 h under argon atmosphere. After cooling, 1,2-dichlorobenzene was removed under reduced pressure and the residue was purified by silica gel column chromatography (eluent:  $\text{CH}_2\text{Cl}_2/\text{hexane} = 1/1$ ). The first violet fraction collected was concentrated to dryness to give **4** in 77% yield (6.9 mg, 7.8  $\mu\text{mol}$ ).

## 2. CV data of **4**

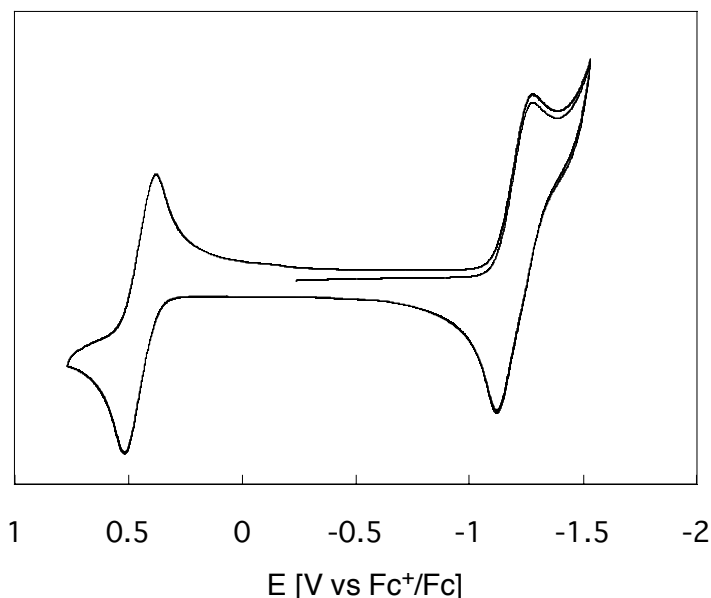

Cyclic voltammogram of **4** (multiple scan between  $-1.53$  V and  $+0.77$  V): 0.1 M  $\text{Bu}_4\text{NPF}_6$  in  $\text{CH}_2\text{Cl}_2$  at 24  $^\circ\text{C}$  with a Pt working electrode. Scan rate = 300 mV/s.
